# Supplementary material
Source: Springer Nature journal article supplement (https://springermedizin.de/resource/supplementary/12984_2008_178_MOESM2_ESM.pdf/9605466)

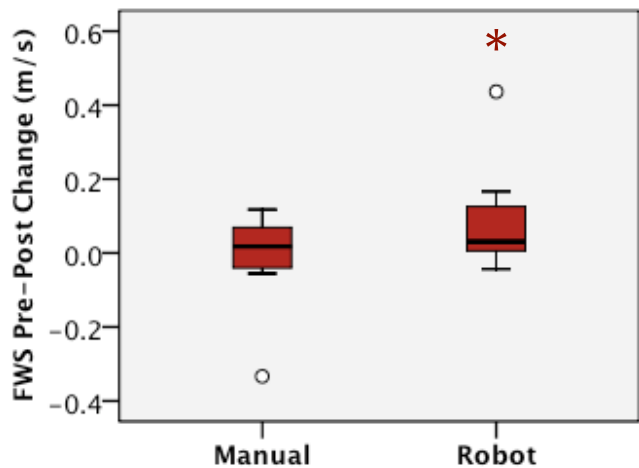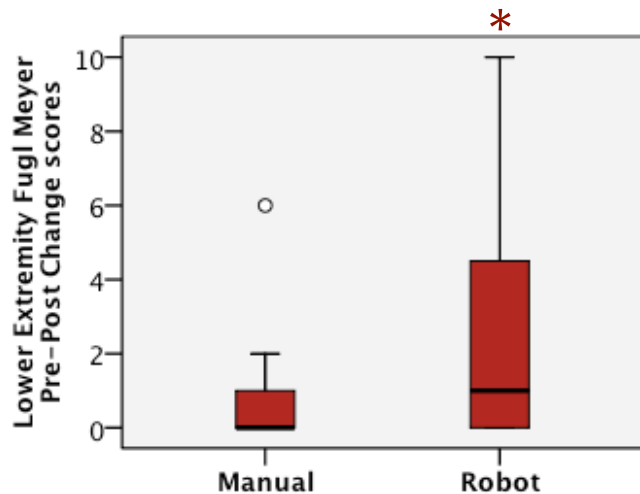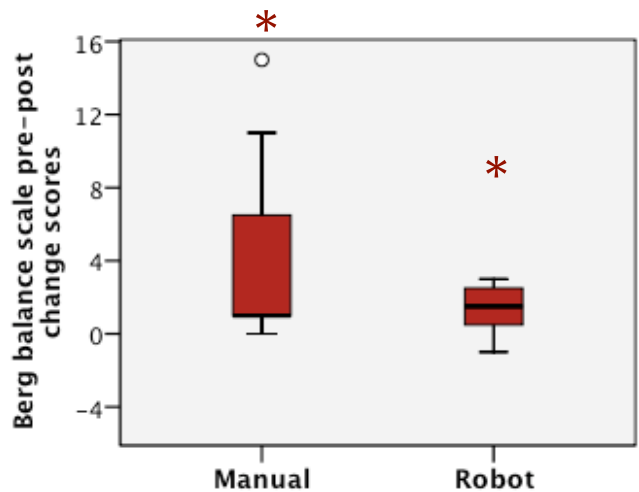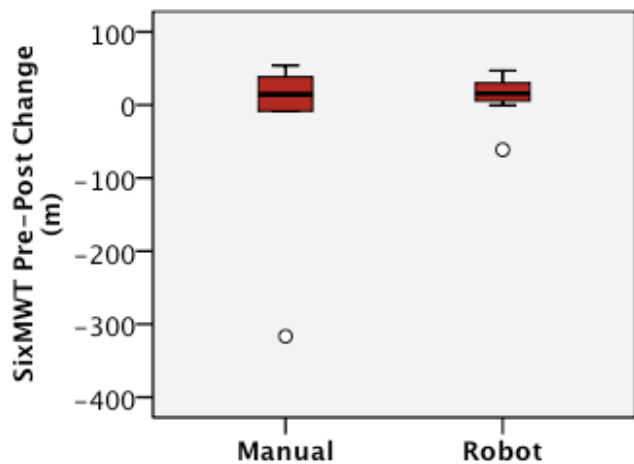

Supplement: MOESM2 [file 9605466]
